# Supplementary material for: Obliv-DB Framework: Secure Query Processing on Cloud-based Database Systems using Distributed Oblivious Access
Source: Research Square preprint supplement (doi:10.21203/rs.3.rs-1606360/v1), 2022-05-05
Supplement: Supplementary file 1 [file deployment_setup.pdf › Figures/deployment_setup.pdf]

Request generation and  
performance evaluation

Handle requests and process responses obliviously  
with outsourced data

Serve data storage on untrusted  
and distributed cloud platforms

Workloads

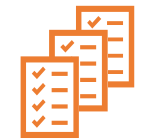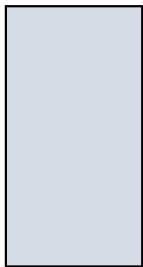

*YCSB Client*

ORAM Client

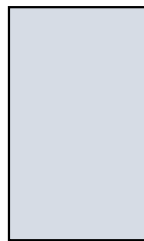

Proxy Server

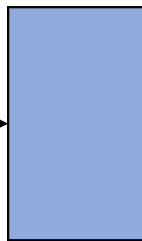

ORAM Server  
Instance 1

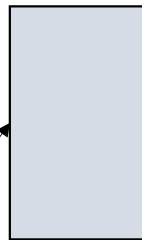

...

ORAM Server  
Instance n

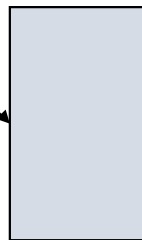

*Distributed ORAM*

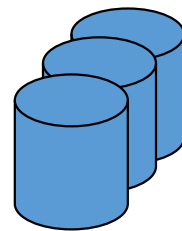

DB Instances

*Database Back-end  
(MongoDB)*
