# Supplementary material for: Obliv-DB Framework: Secure Query Processing on Cloud-based Database Systems using Distributed Oblivious Access
Source: Research Square preprint supplement (doi:10.21203/rs.3.rs-1606360/v1), 2022-05-05
Supplement: Supplementary file 3 [file eva_network_setup.pdf › Figures/eva_network_setup.pdf]

Physical Server

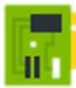

Physical NIC

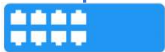

Virtual Switch

Inter VLAN 100Mbps

Inter VLAN 100Mbps

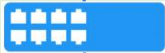

Virtual Switch

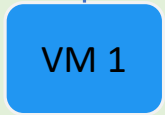

VM 1

YCSB Client

vmnet\_0

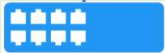

Virtual Switch

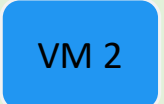

VM 2

ORAM Client

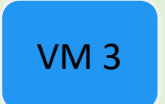

VM 3

Proxy Server

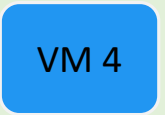

VM 4

...

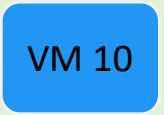

VM 10

ORAM Server Instances

vmnet\_1

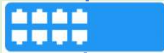

Virtual Switch

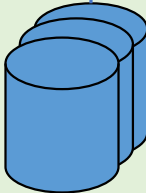

DB Instances

vmnet\_2
