# Supplementary material for: Obliv-DB Framework: Secure Query Processing on Cloud-based Database Systems using Distributed Oblivious Access
Source: Research Square preprint supplement (doi:10.21203/rs.3.rs-1606360/v1), 2022-05-05
Supplement: Supplementary file 8 [file eva_response_time_row_both.pdf › Figures/eva_response_time_row_both.pdf]

Response Time for Row Oriented Queries with Fixed Columns

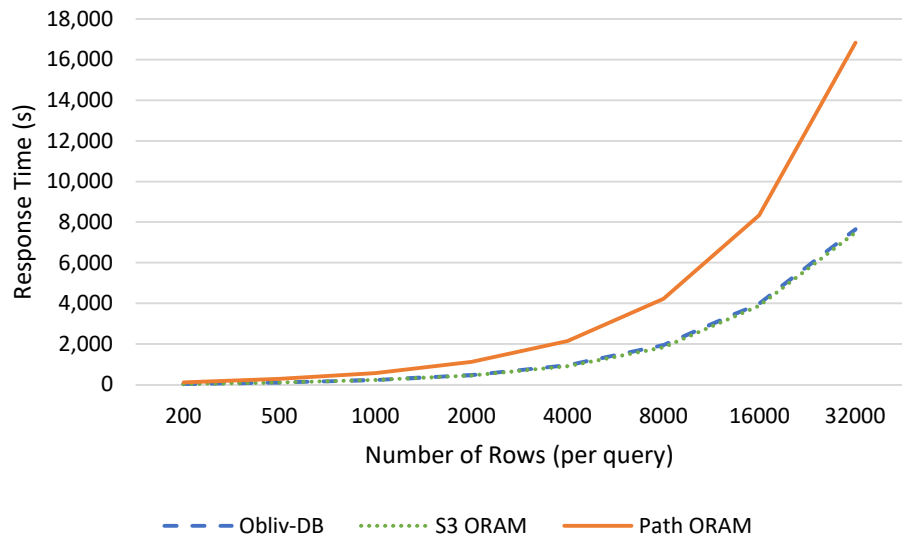

(a)

Average Response Time for Row Oriented Queries

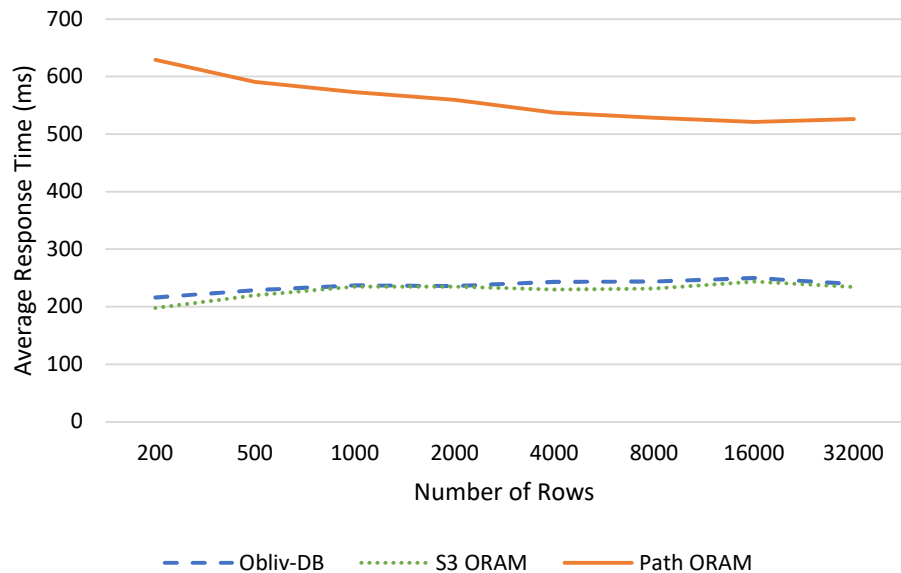

(b)
