# Supplementary material for: Obliv-DB Framework: Secure Query Processing on Cloud-based Database Systems using Distributed Oblivious Access
Source: Research Square preprint supplement (doi:10.21203/rs.3.rs-1606360/v1), 2022-05-05

a) Throughput of Obliv-DB Framework for Varying Column Sizes

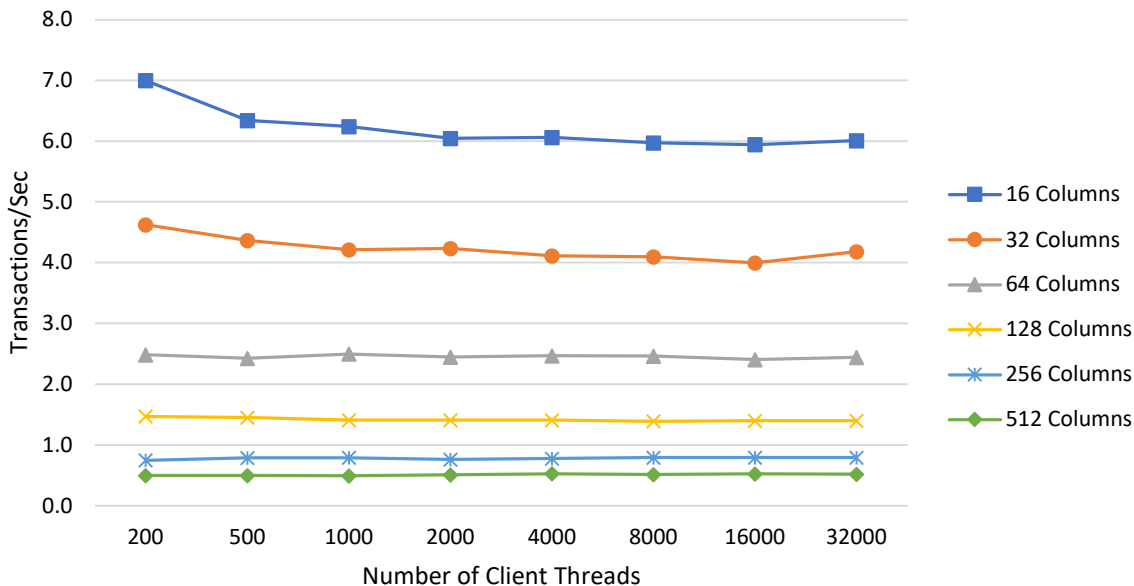

b) Throughput of Path ORAM Framework for Varying Column Sizes

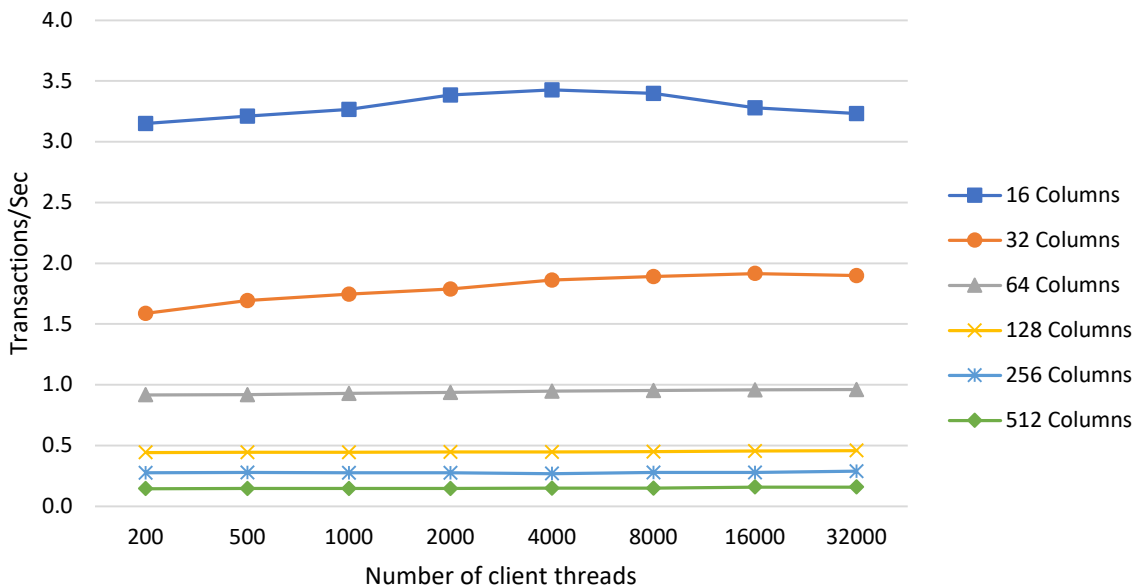

Supplement: Supplementary file 9 [file eva_throughput_both.pdf › Figures/eva_throughput_both.pdf]
