# Supplementary material for: Obliv-DB Framework: Secure Query Processing on Cloud-based Database Systems using Distributed Oblivious Access
Source: Research Square preprint supplement (doi:10.21203/rs.3.rs-1606360/v1), 2022-05-05
Supplement: Supplementary file 13 [file eva_throughput_dist_no_oram.pdf › Figures/eva_throughput_dist_no_oram.pdf]

Throughput Distribution Among Different Workloads  
without ORAM Integration

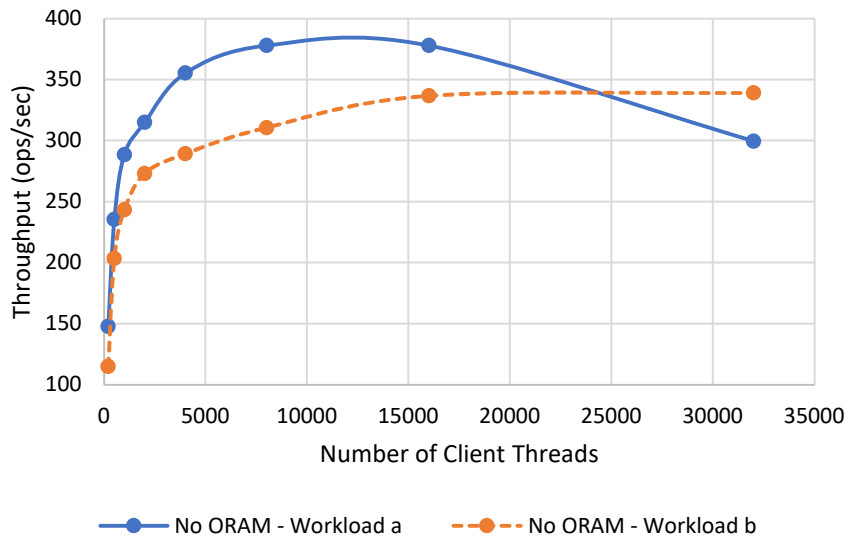

(a)

Latency Distribution Among Different Workloads  
without ORAM Integration

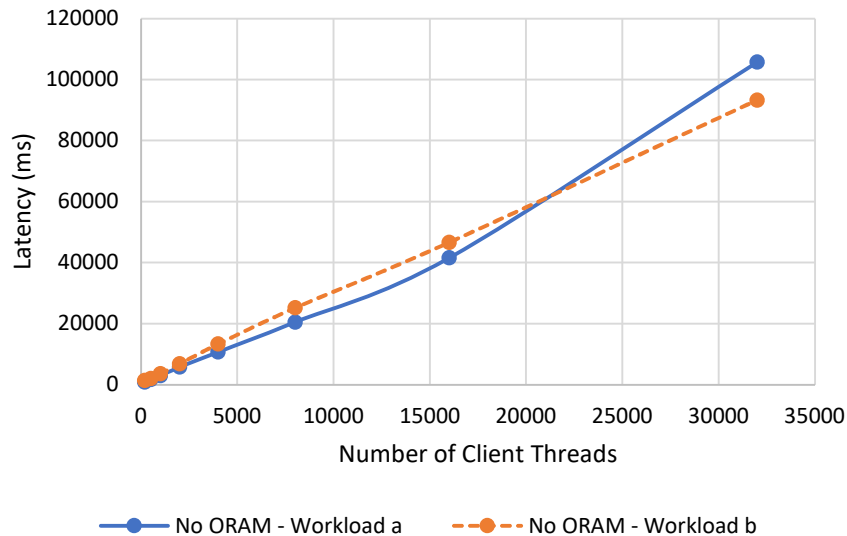

(b)
