# Supplementary material for: Obliv-DB Framework: Secure Query Processing on Cloud-based Database Systems using Distributed Oblivious Access
Source: Research Square preprint supplement (doi:10.21203/rs.3.rs-1606360/v1), 2022-05-05
Supplement: Supplementary file 18 [file oblivSQL_eviction.pdf › Figures/oblivSQL_eviction.pdf]

①

Client generates permutation matrix  $I$  for each server instance and send them to Proxy Server.

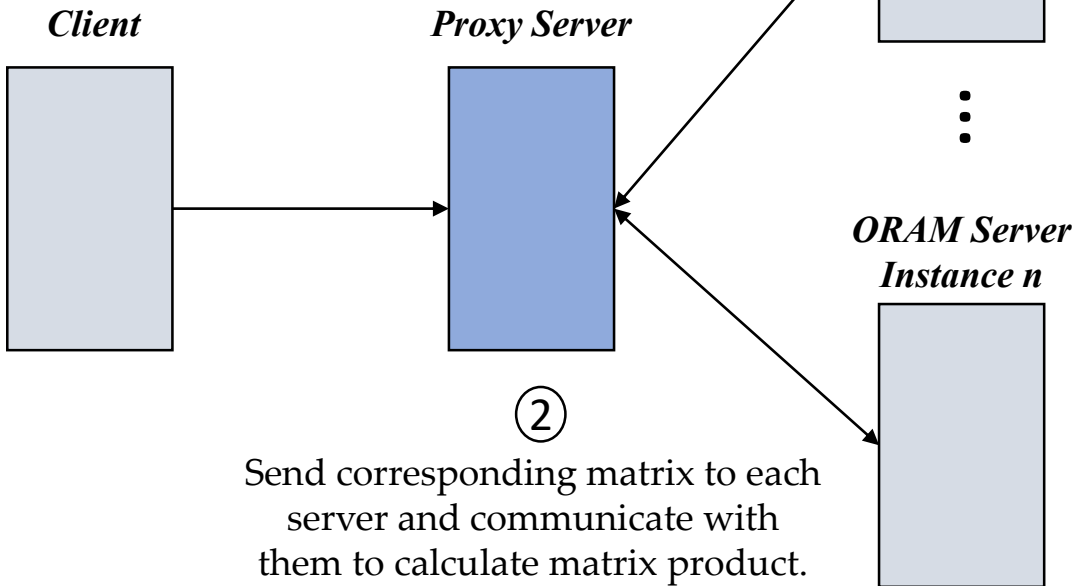

Send corresponding matrix to each server and communicate with them to calculate matrix product.

③

Each server does the matrix product of  $\vec{u}$  and permutation matrix.

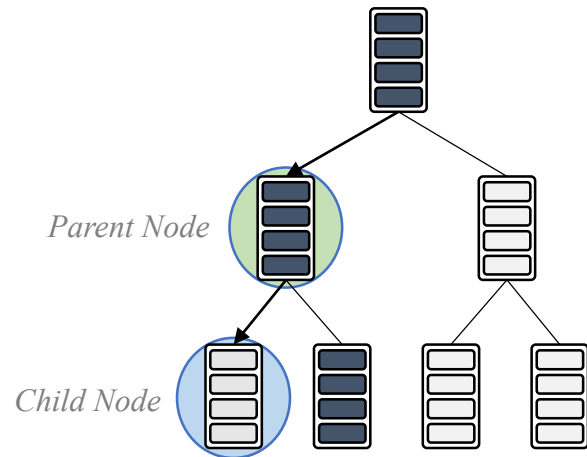

$$\vec{u}^{1 \times 2Z} \cdot I^{2Z \times Z}$$

$$\vec{u} = \begin{array}{|c|c|c|c|c|c|c|c|c|c|} \hline x & & \dots & & & & b & \dots & & \\ \hline \end{array}$$

$$\vec{v} = \begin{array}{|c|c|c|c|c|} \hline x & b & \dots & & \\ \hline \end{array}$$
