# Supplementary material for: Obliv-DB Framework: Secure Query Processing on Cloud-based Database Systems using Distributed Oblivious Access
Source: Research Square preprint supplement (doi:10.21203/rs.3.rs-1606360/v1), 2022-05-05
Supplement: Supplementary file 21 [file oram_evolution.pdf › Figures/oram_evolution.pdf]

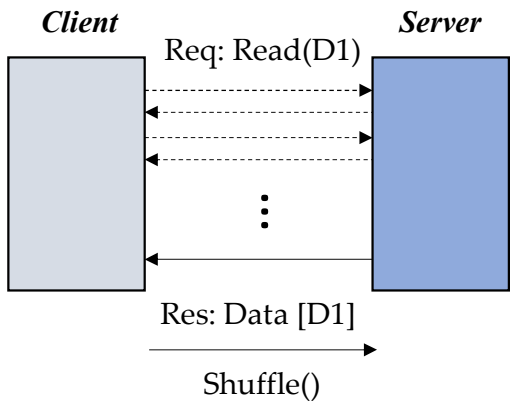

Reads all the buckets in the path from root, and client shuffles data after every read.

(a)

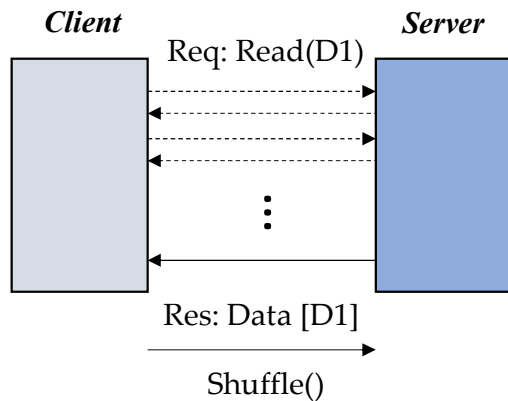

Only reads the desired block from each bucket, and shuffles data based on how many times a bucket is accessed.

(b)

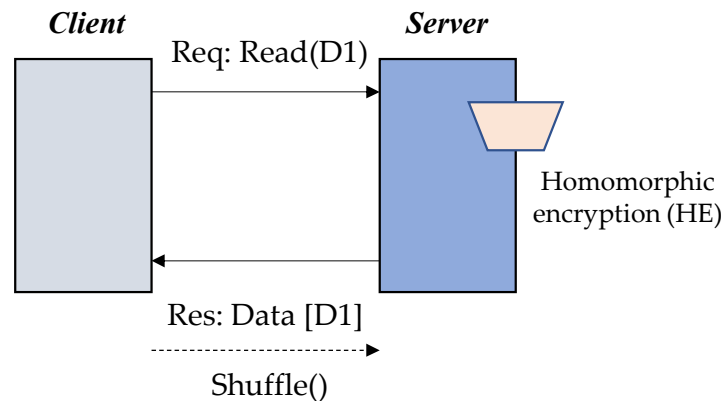

Only reads the desired block, and client instructs (sends select vector) the server to shuffle data.

(c)

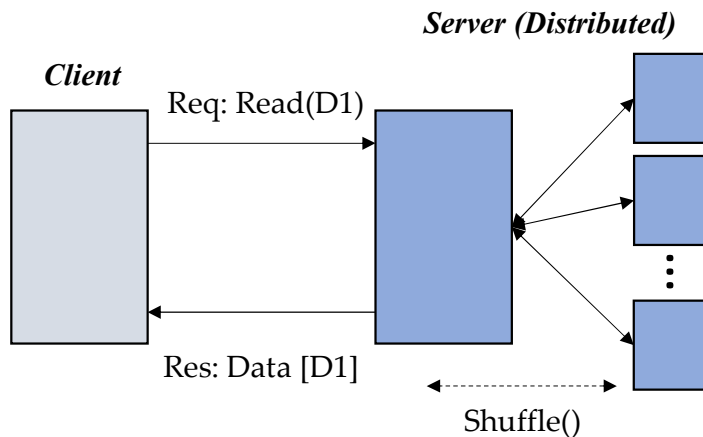

Servers shuffle data by themselves without the direct involvement of the client.

(d)
