# Supplementary material for: Obliv-DB Framework: Secure Query Processing on Cloud-based Database Systems using Distributed Oblivious Access
Source: Research Square preprint supplement (doi:10.21203/rs.3.rs-1606360/v1), 2022-05-05
Supplement: Supplementary file 23 [file reverse_lexicographic_order.pdf › Figures/reverse_lexicographic_order.pdf]

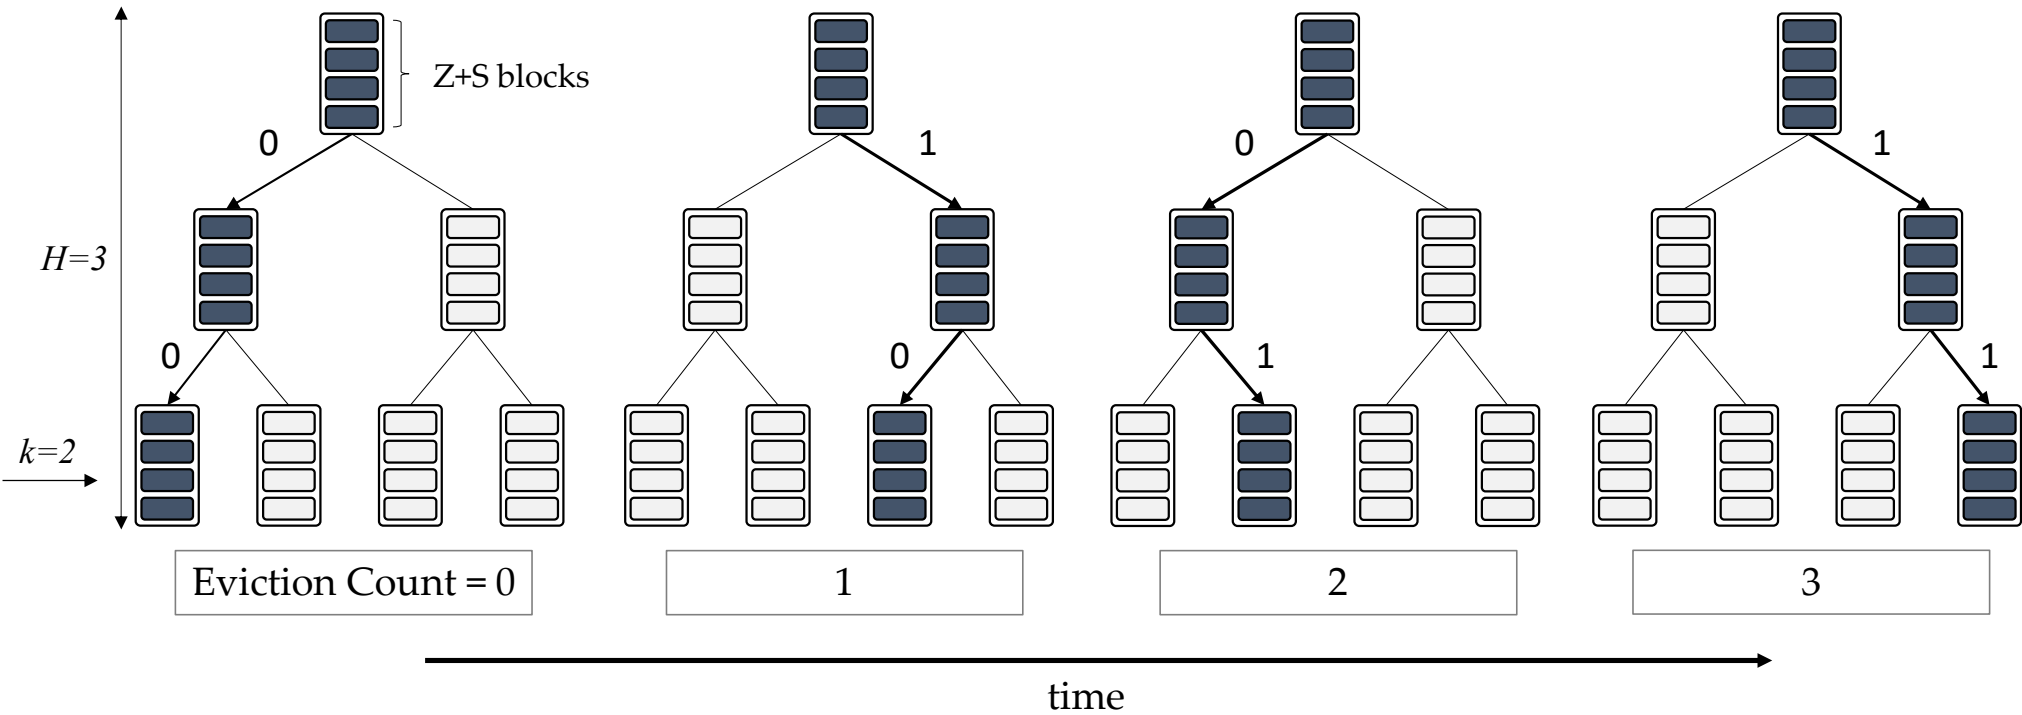

The eviction process is scheduled statically and performed with a deterministic procedure according to the reverse lexicographic order by picking one leaf in every time step.

$$\text{Selected Leaf} = \text{DigitReverse}_k(t \bmod k^H)$$
