# Supplementary material for: Obliv-DB Framework: Secure Query Processing on Cloud-based Database Systems using Distributed Oblivious Access
Source: Research Square preprint supplement (doi:10.21203/rs.3.rs-1606360/v1), 2022-05-05
Supplement: Supplementary file 24 [file tree_based_oram.pdf › Figures/tree_based_oram.pdf]

Someone sniffing into the communication channel

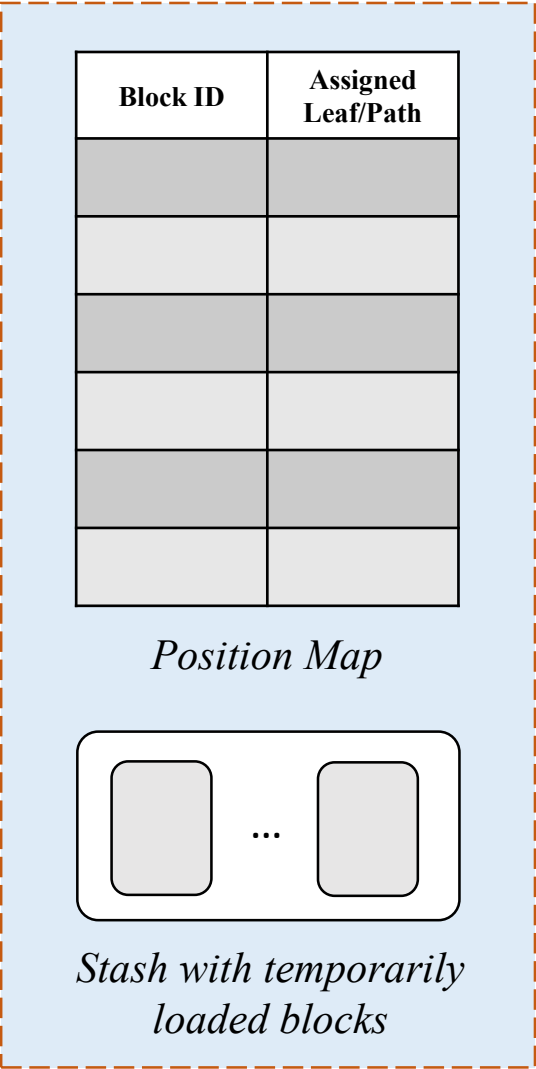

Client-Side

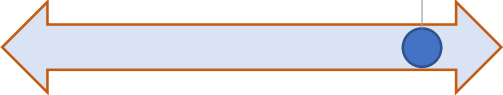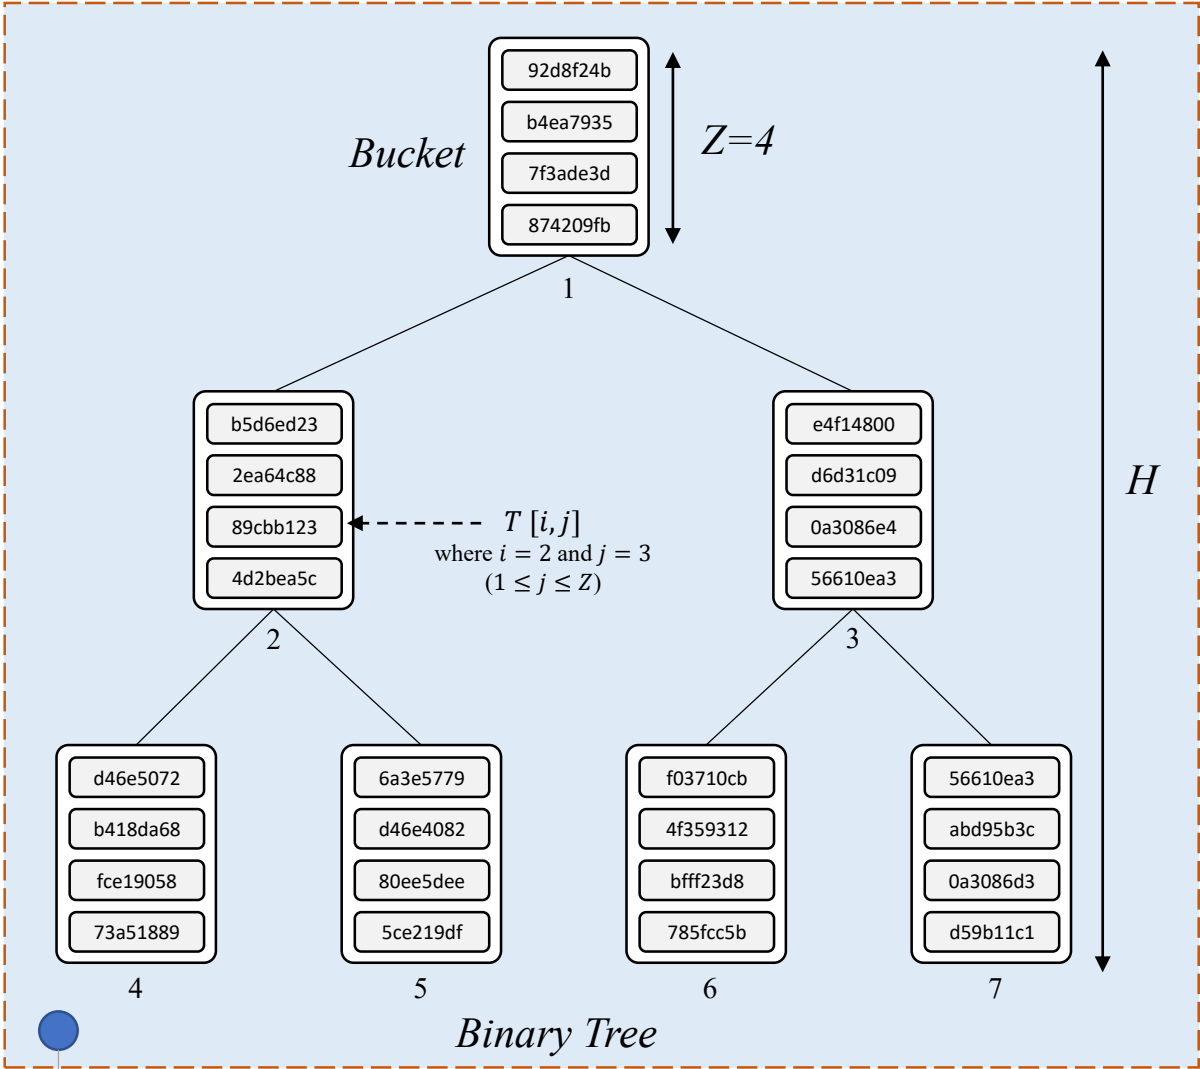

Binary Tree

Server-Side

Authorized high privileged user (e.g. administrator)
