# Supplementary figures and images for: Obliv-DB Framework: Secure Query Processing on Cloud-based Database Systems using Distributed Oblivious Access
Source: Research Square preprint supplement (doi:10.21203/rs.3.rs-1606360/v1), 2022-05-05

### Latency Overhead Owing to ORAM Integration

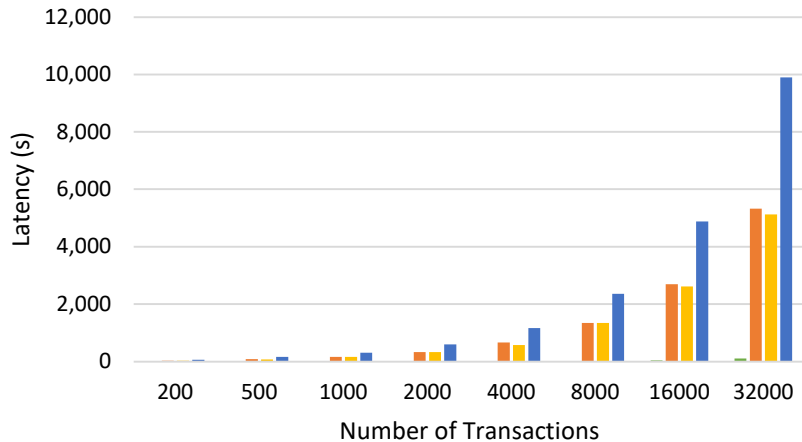

(a)

### Latency Overhead Owing to ORAM Integration

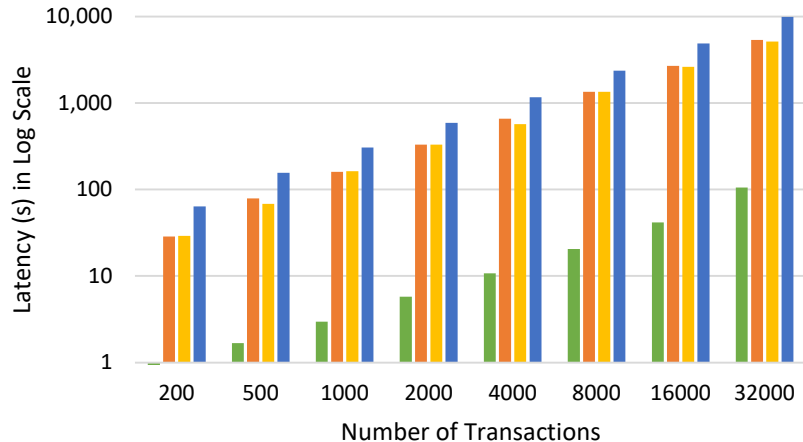

(b)

Supplement: Supplementary file 2 [file eva_latency_overhead.pdf › Figures/eva_latency_overhead.pdf]

# ORAM Preperation Time for Column Oriented Setup

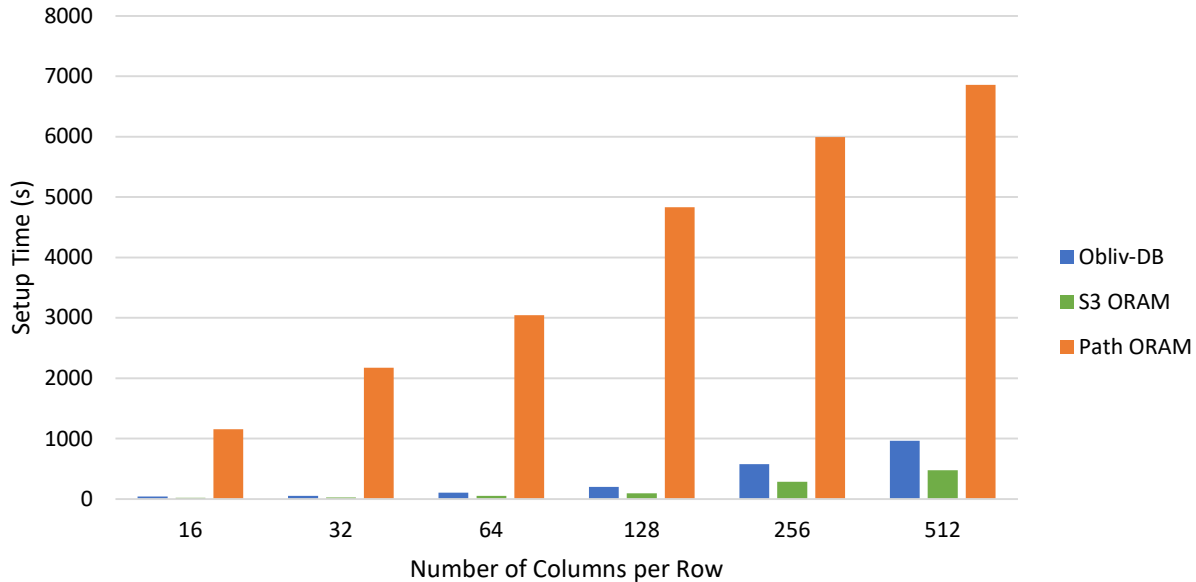

Supplement: Supplementary file 4 [file eva_preperation_time_col.pdf › Figures/eva_preperation_time_col.pdf]

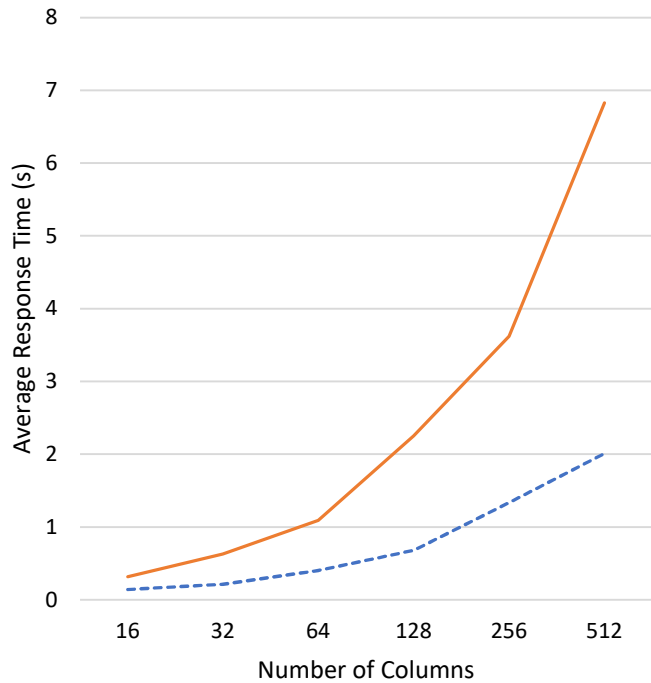

a)

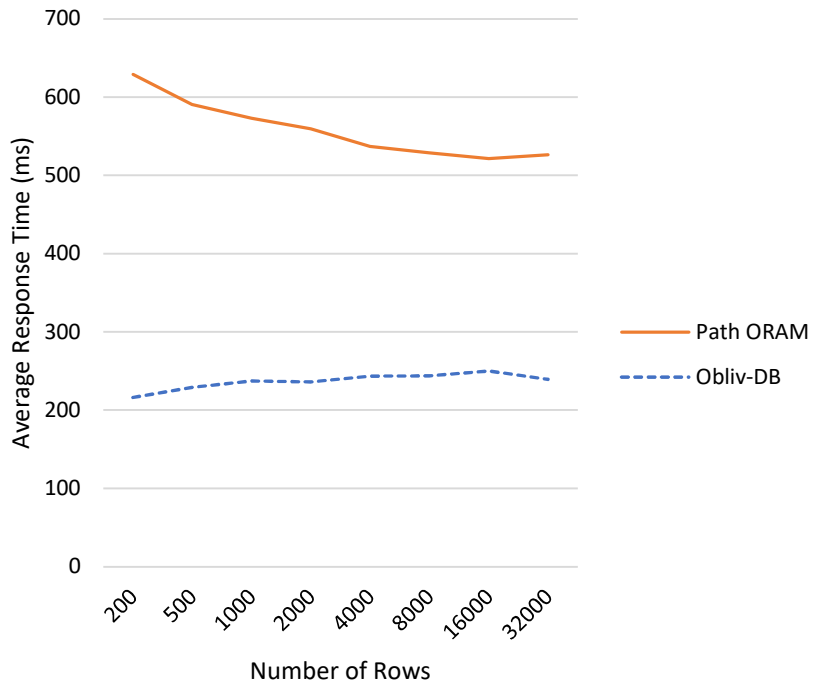

b)

Supplement: Supplementary file 5 [file eva_response_time_both.pdf › Figures/eva_response_time_both.pdf]

Response Time for a Single Column Related Query with 32K Rows

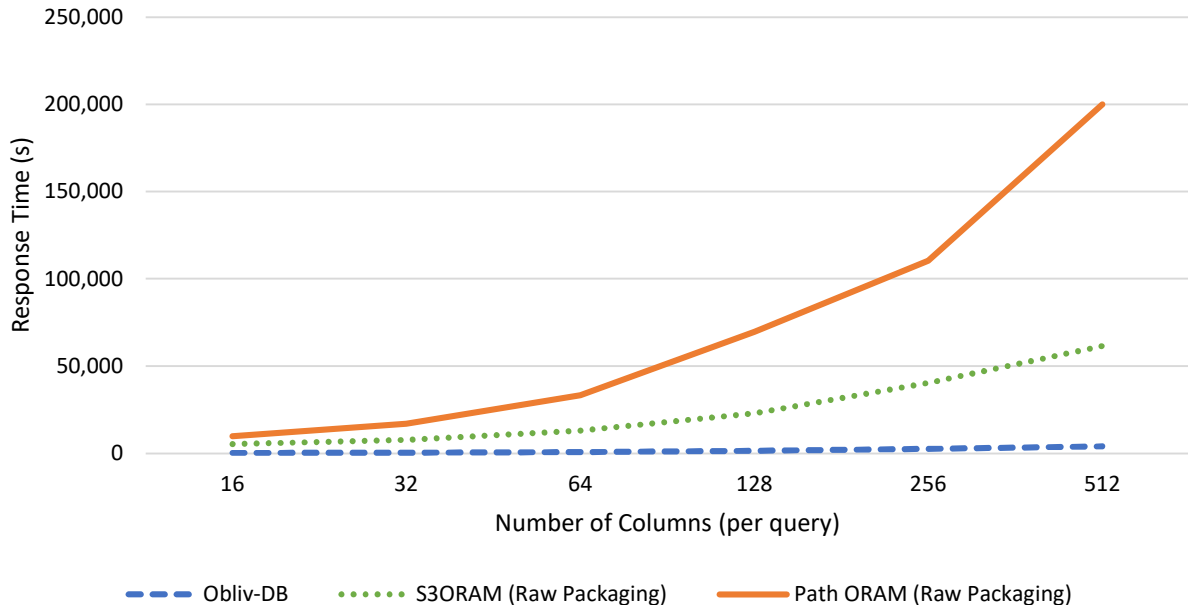

Supplement: Supplementary file 6 [file eva_response_time_col.pdf › Figures/eva_response_time_col.pdf]

# Response Time for Row Oriented Queries with Fixed Columns

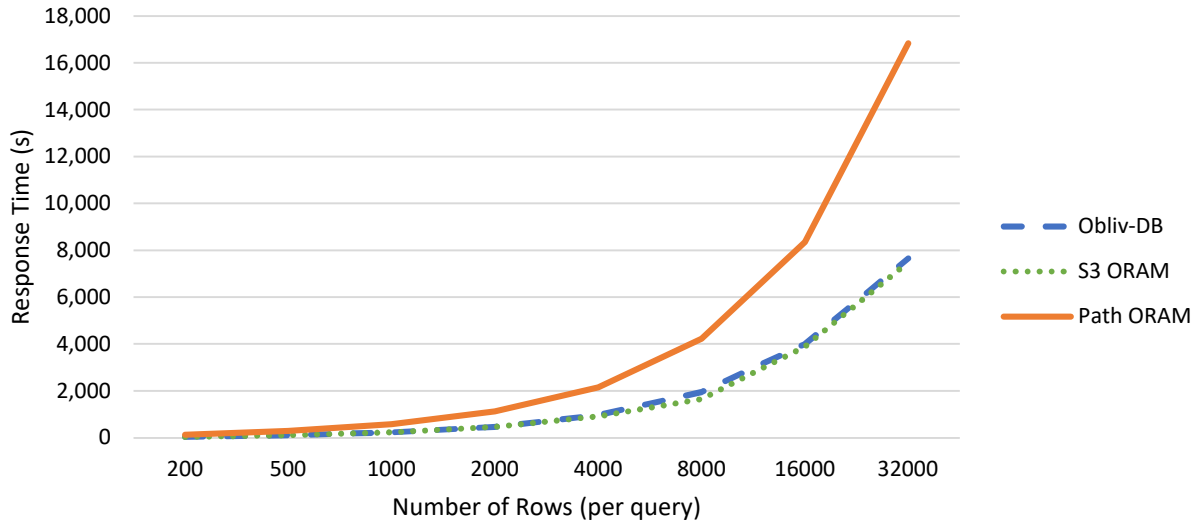

Supplement: Supplementary file 7 [file eva_response_time_row.pdf › Figures/eva_response_time_row.pdf]

# Comparison of Throughput Distribution Among Different Workloads

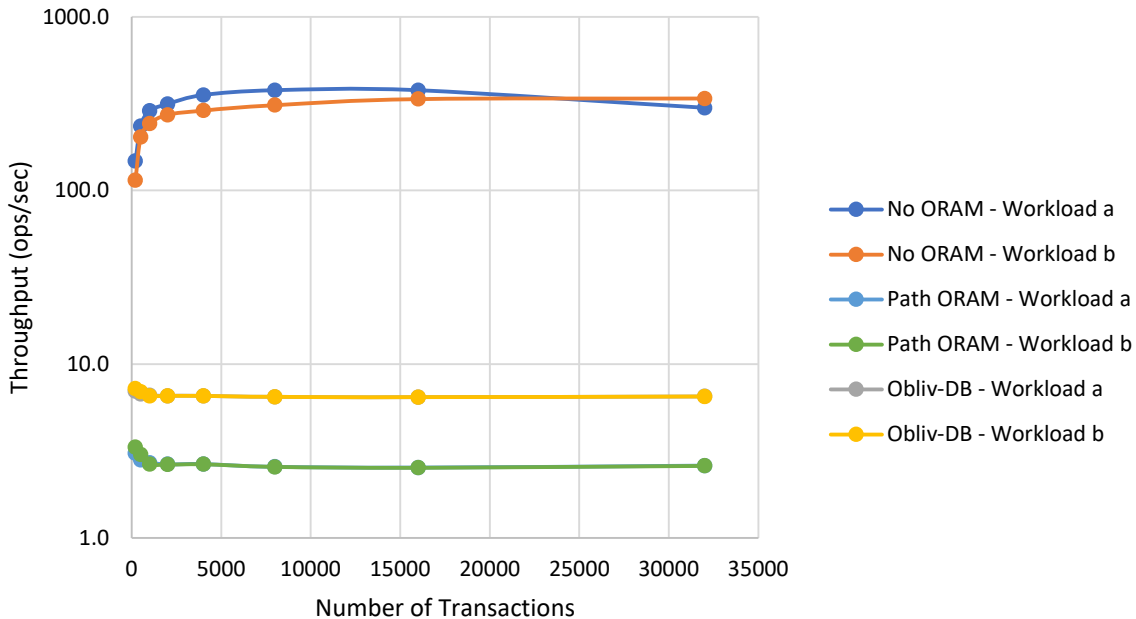

Supplement: Supplementary file 10 [file eva_throughput_dist_all.old.pdf › Figures/eva_throughput_dist_all.old.pdf]

# Comparison of Throughput Distribution Among Different Workloads

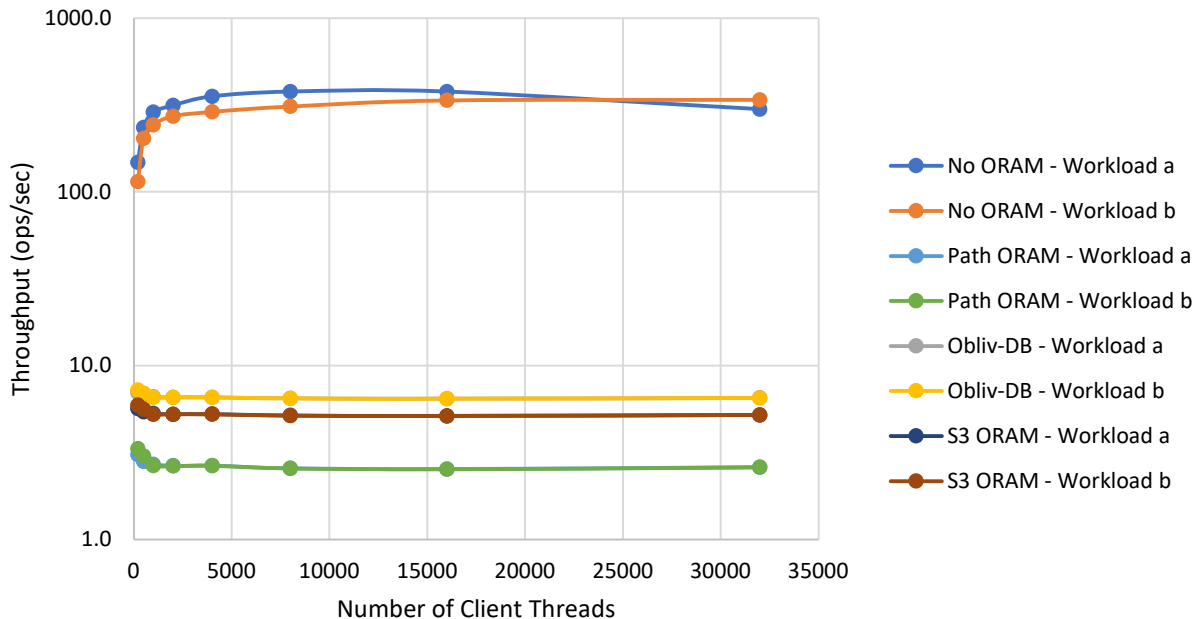

Supplement: Supplementary file 11 [file eva_throughput_dist_all.pdf › Figures/eva_throughput_dist_all.pdf]

Throughput Distribution Among Different Workloads  
without ORAM Integration

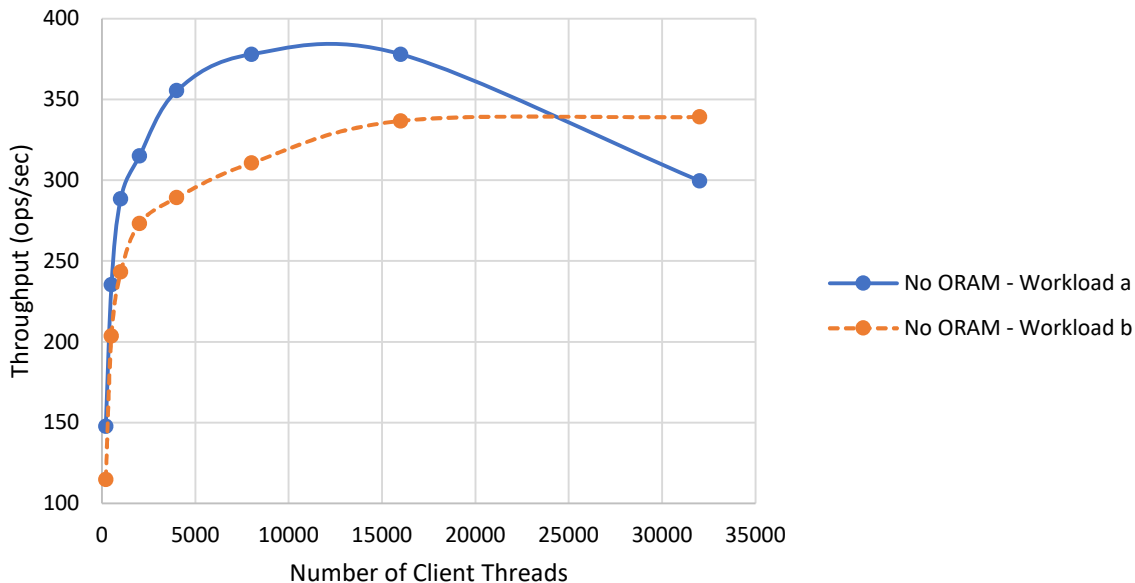

Supplement: Supplementary file 12 [file eva_throughput_dist_no_oram.old.pdf › Figures/eva_throughput_dist_no_oram.old.pdf]

Throughput Distribution Among Different Workloads  
with ORAM Integration

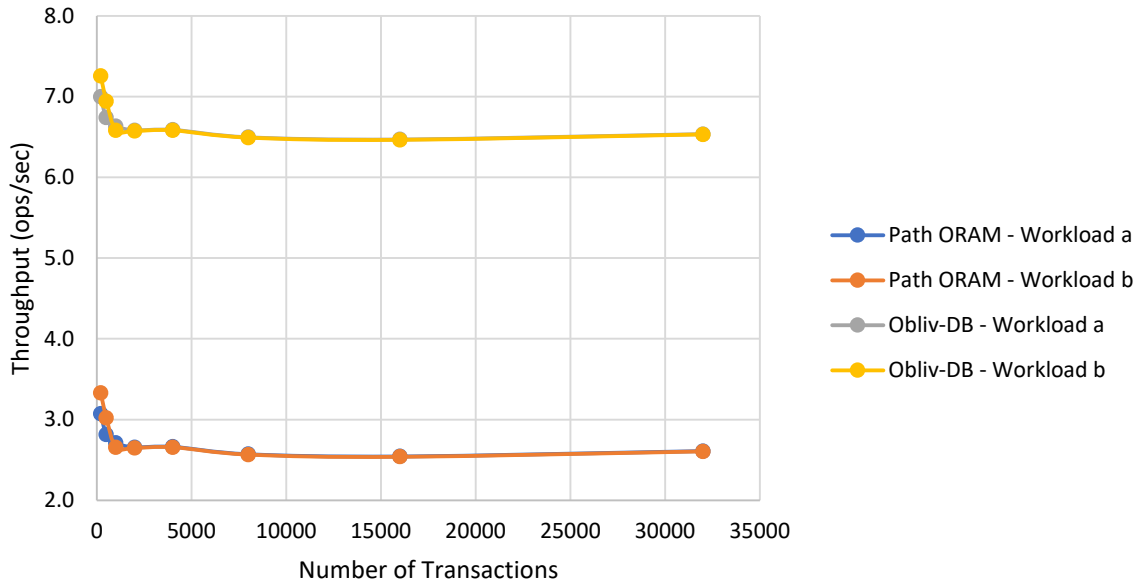

Supplement: Supplementary file 14 [file eva_throughput_dist_oram.old.pdf › Figures/eva_throughput_dist_oram.old.pdf]

Throughput Distribution Among Different Workloads  
with ORAM Integration

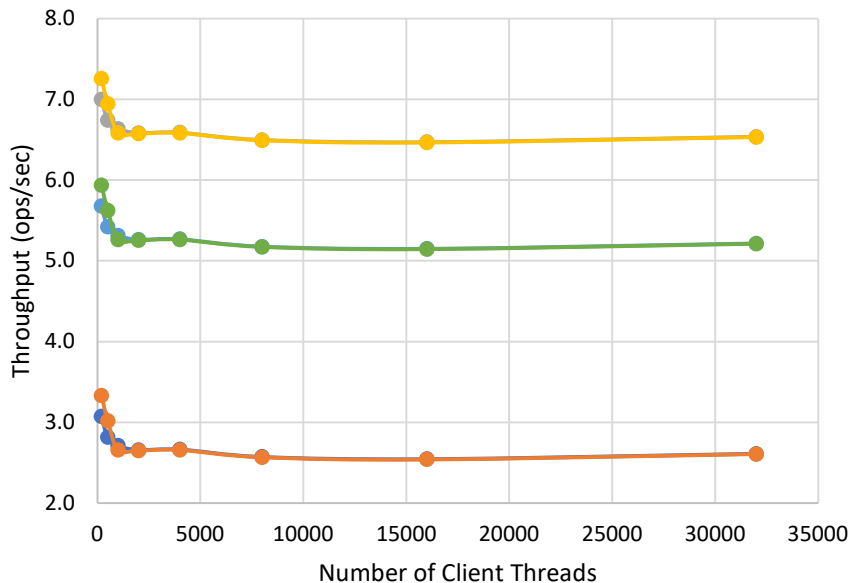

Supplement: Supplementary file 15 [file eva_throughput_dist_oram.pdf › Figures/eva_throughput_dist_oram.pdf]

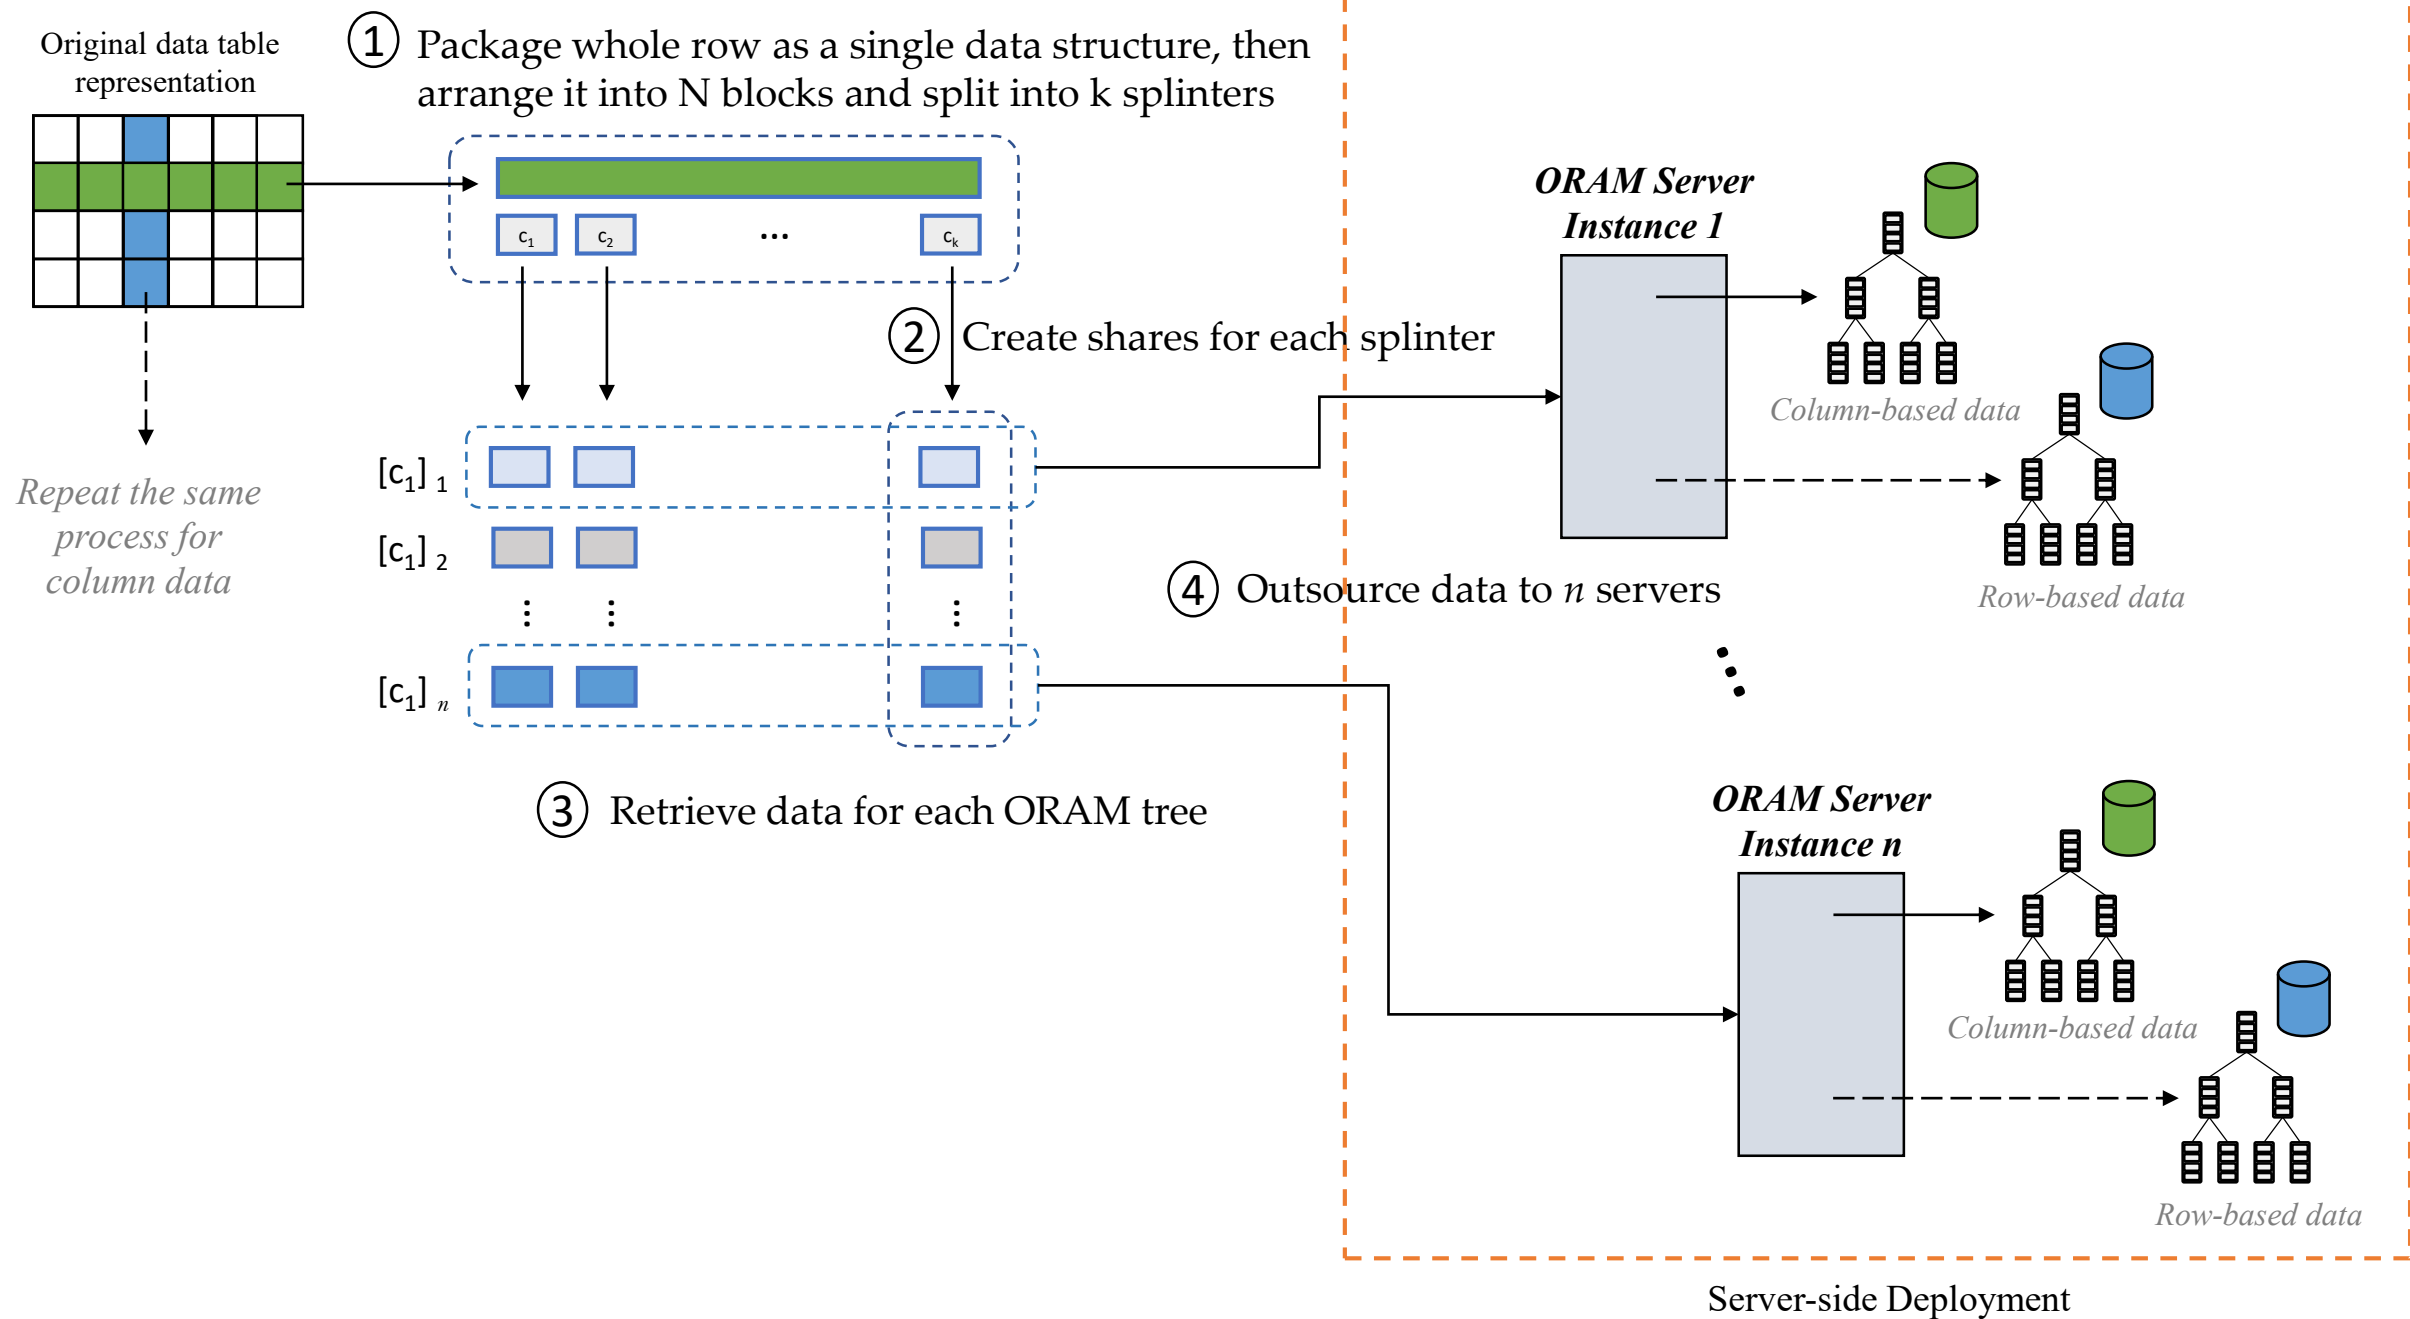

Supplement: Supplementary file 16 [file oblivSQL_data_access.pdf › Figures/oblivSQL_data_access.pdf]

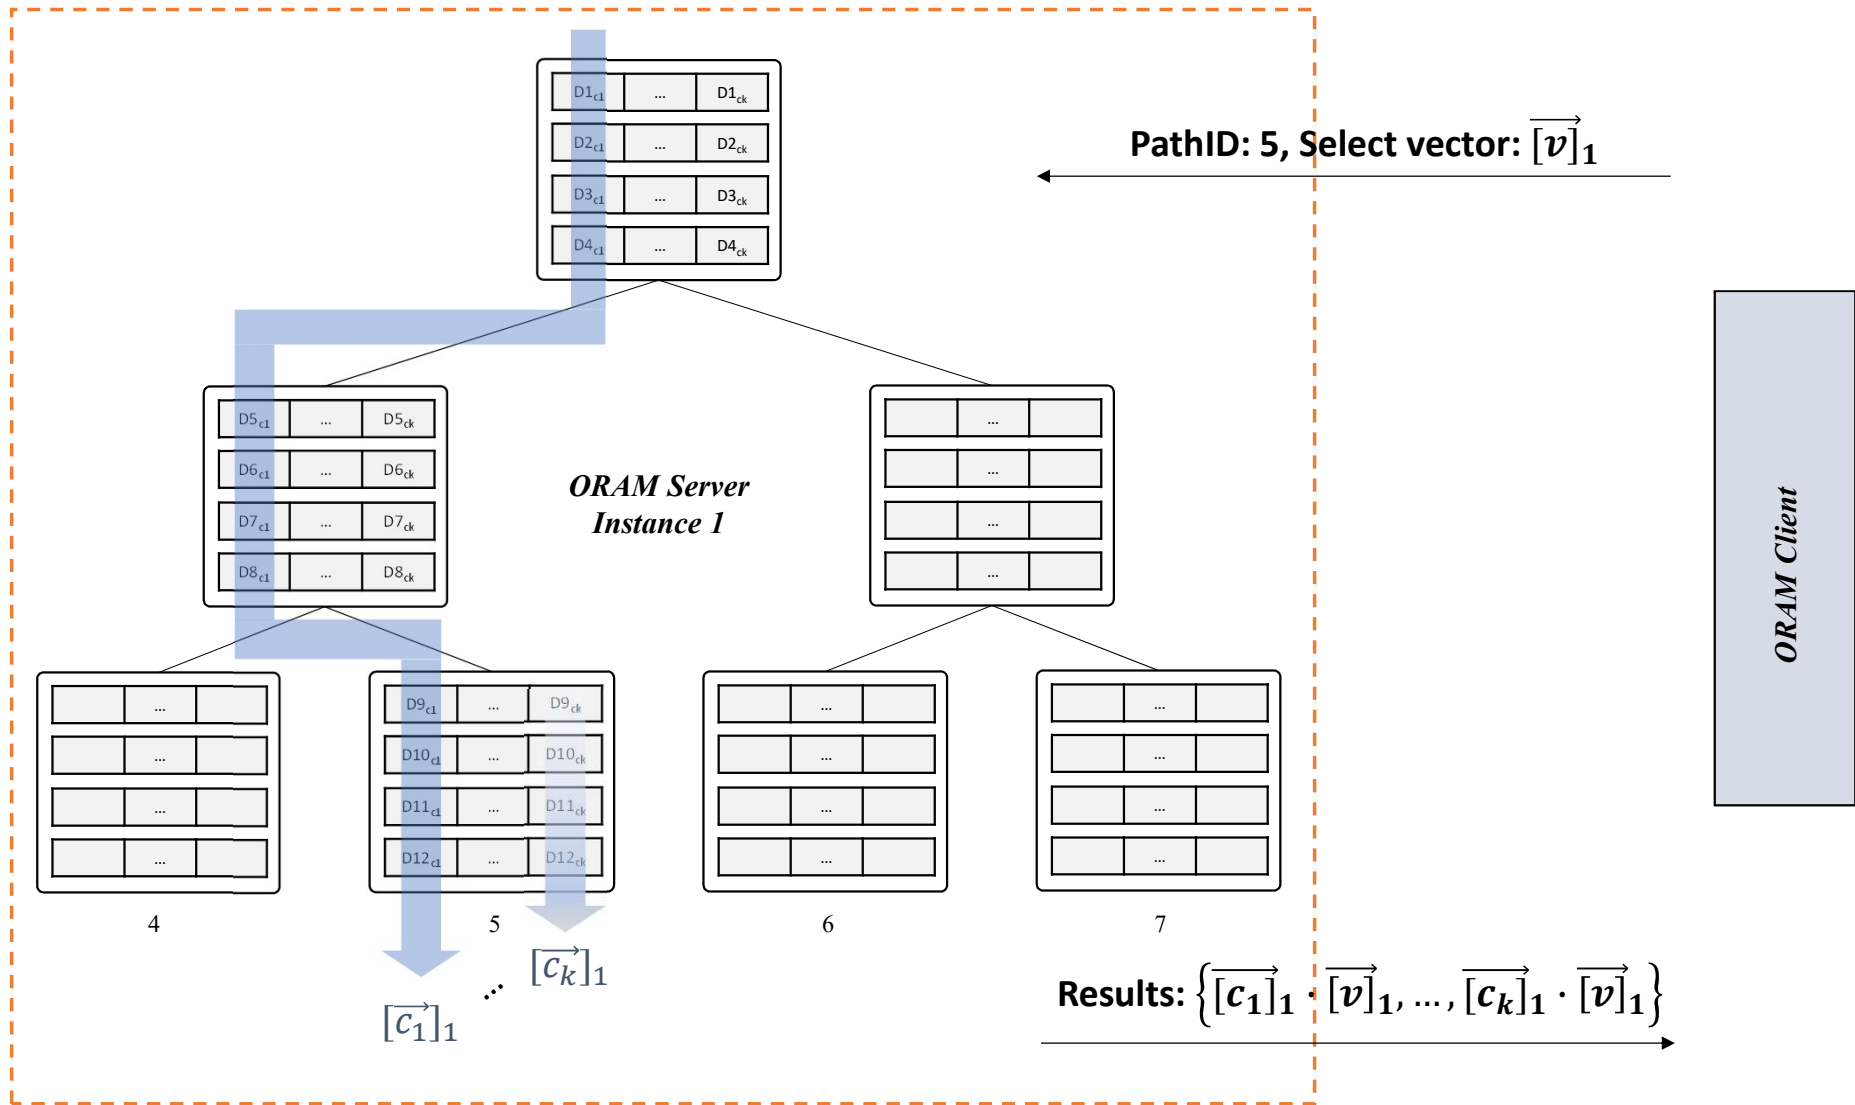

Supplement: Supplementary file 17 [file oblivSQL_data_retrieval.pdf › Figures/oblivSQL_data_retrieval.pdf]

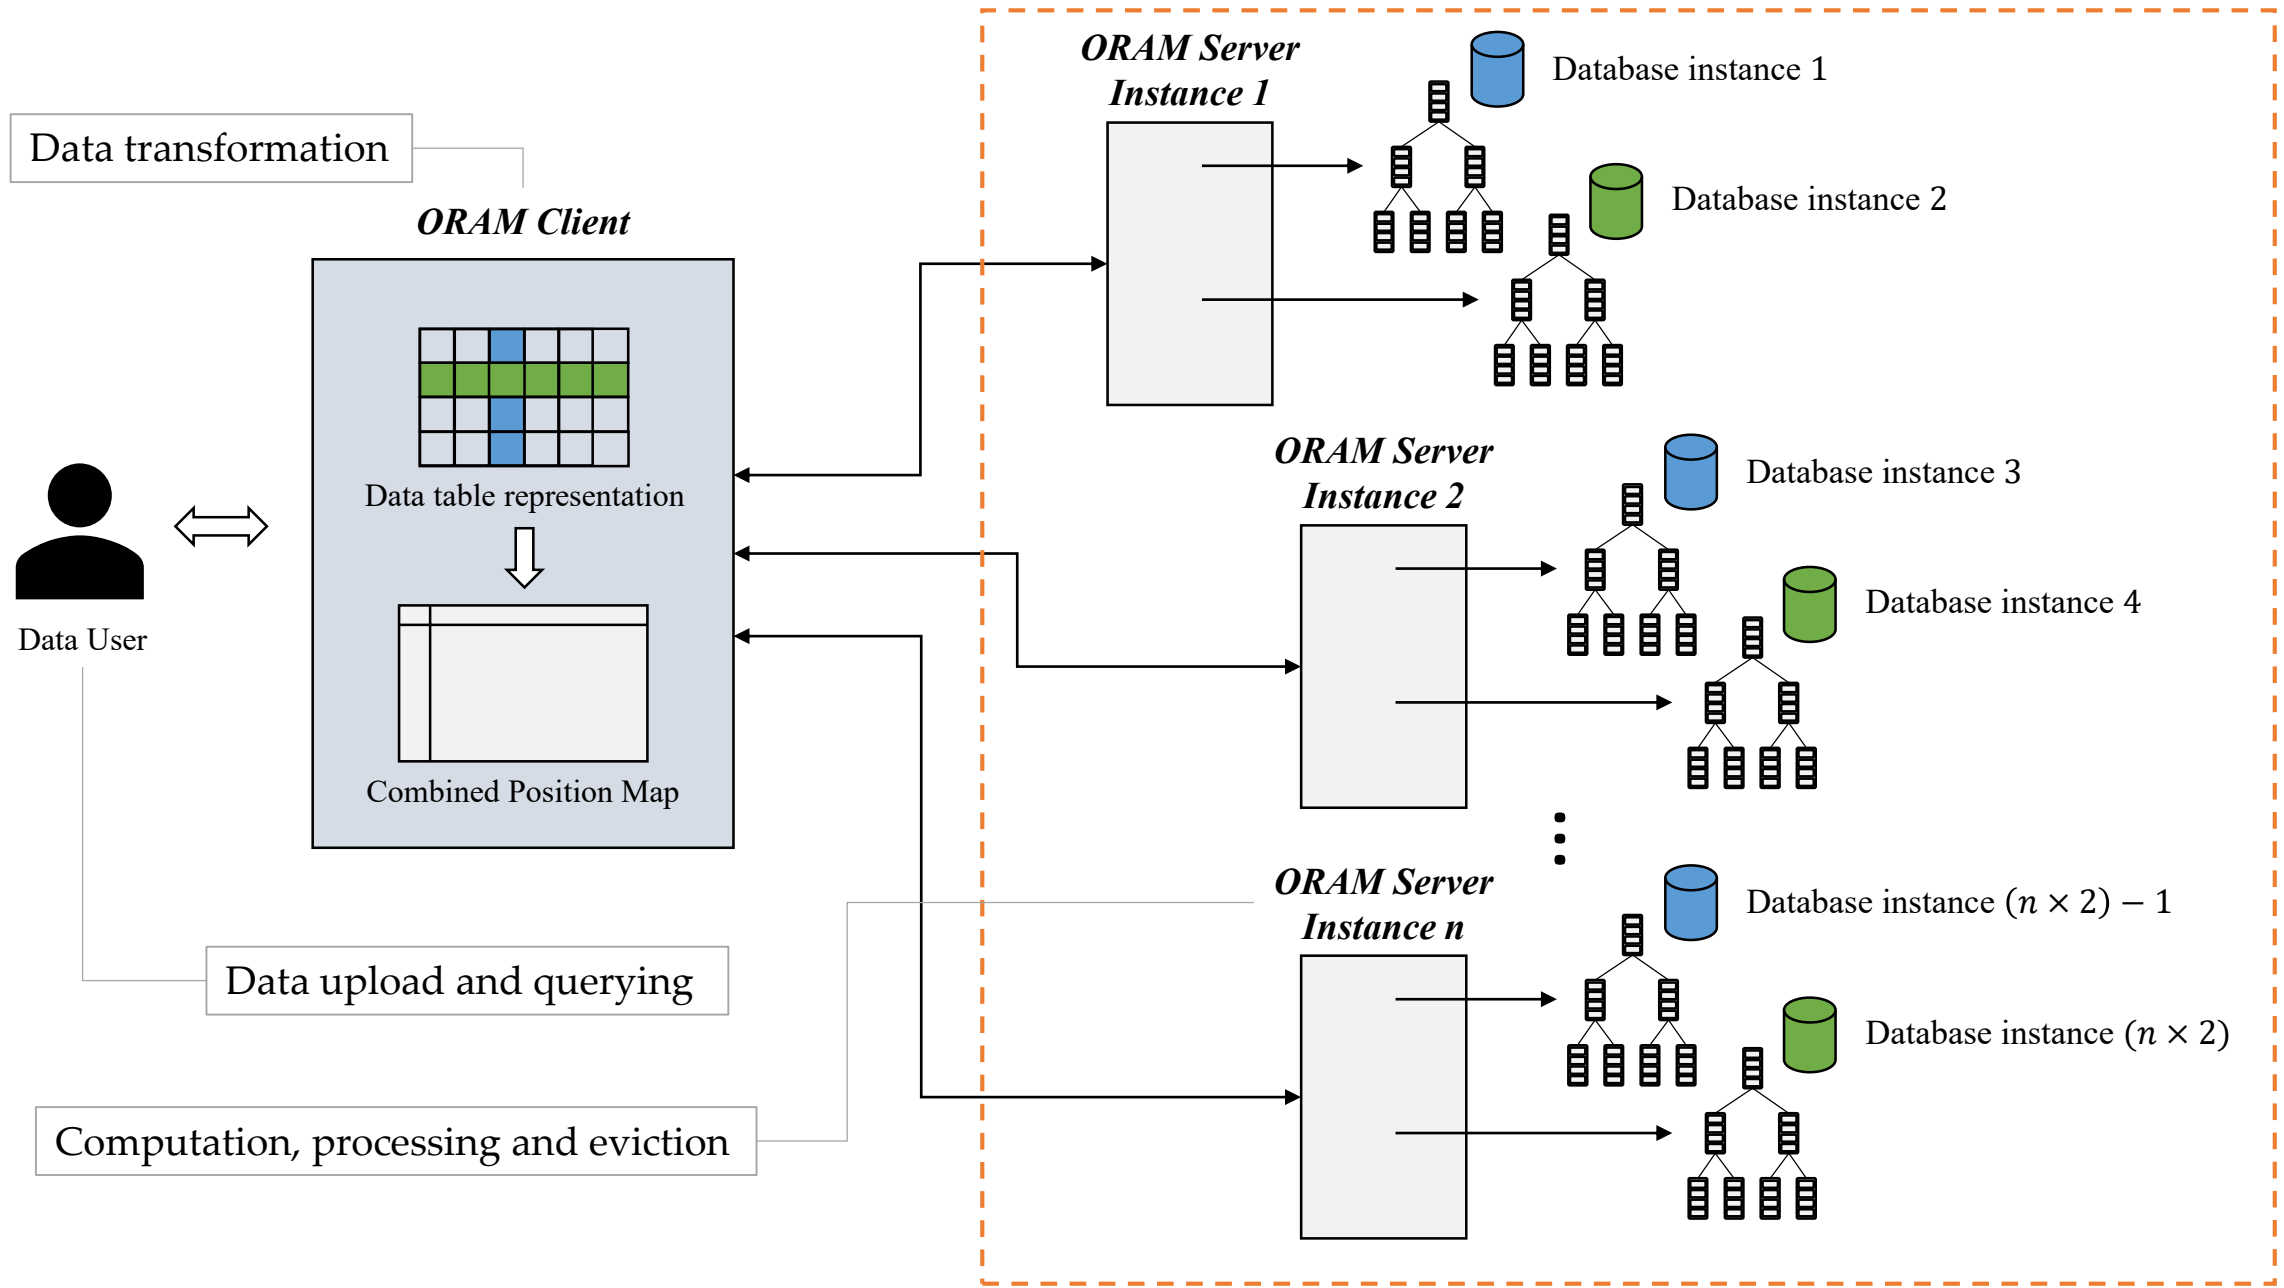

Cloud-based Server Deployment along with Database Instances

Supplement: Supplementary file 19 [file obliviousdb_framework.pdf › Figures/obliviousdb_framework.pdf]

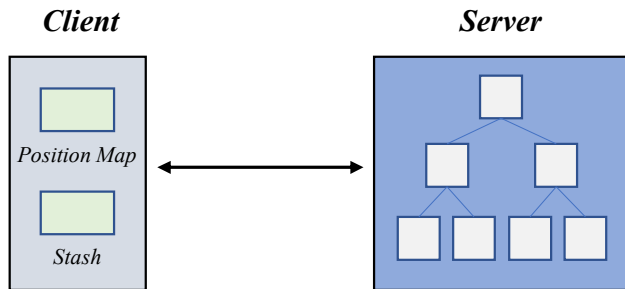

(a)

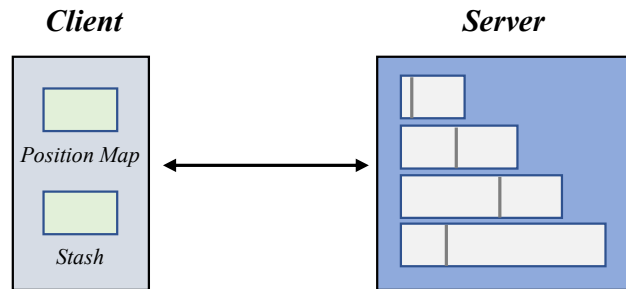

(b)

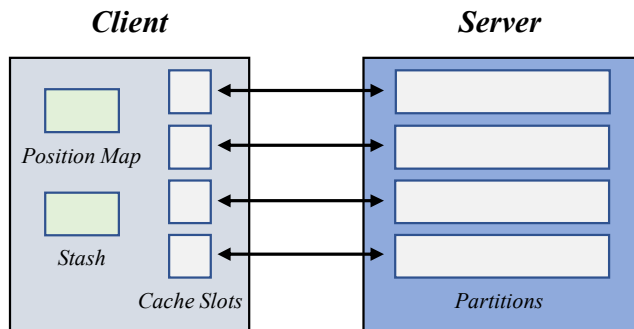

(c)

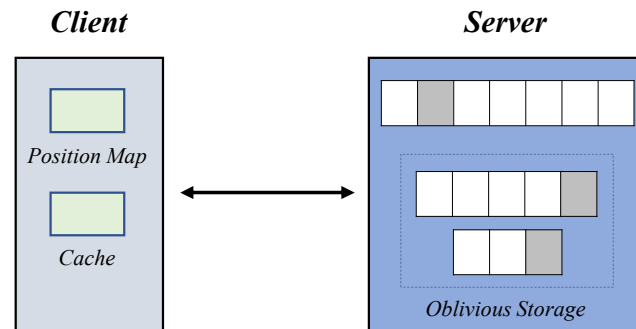

(d)

Supplement: Supplementary file 20 [file oram_designs.pdf › Figures/oram_designs.pdf]

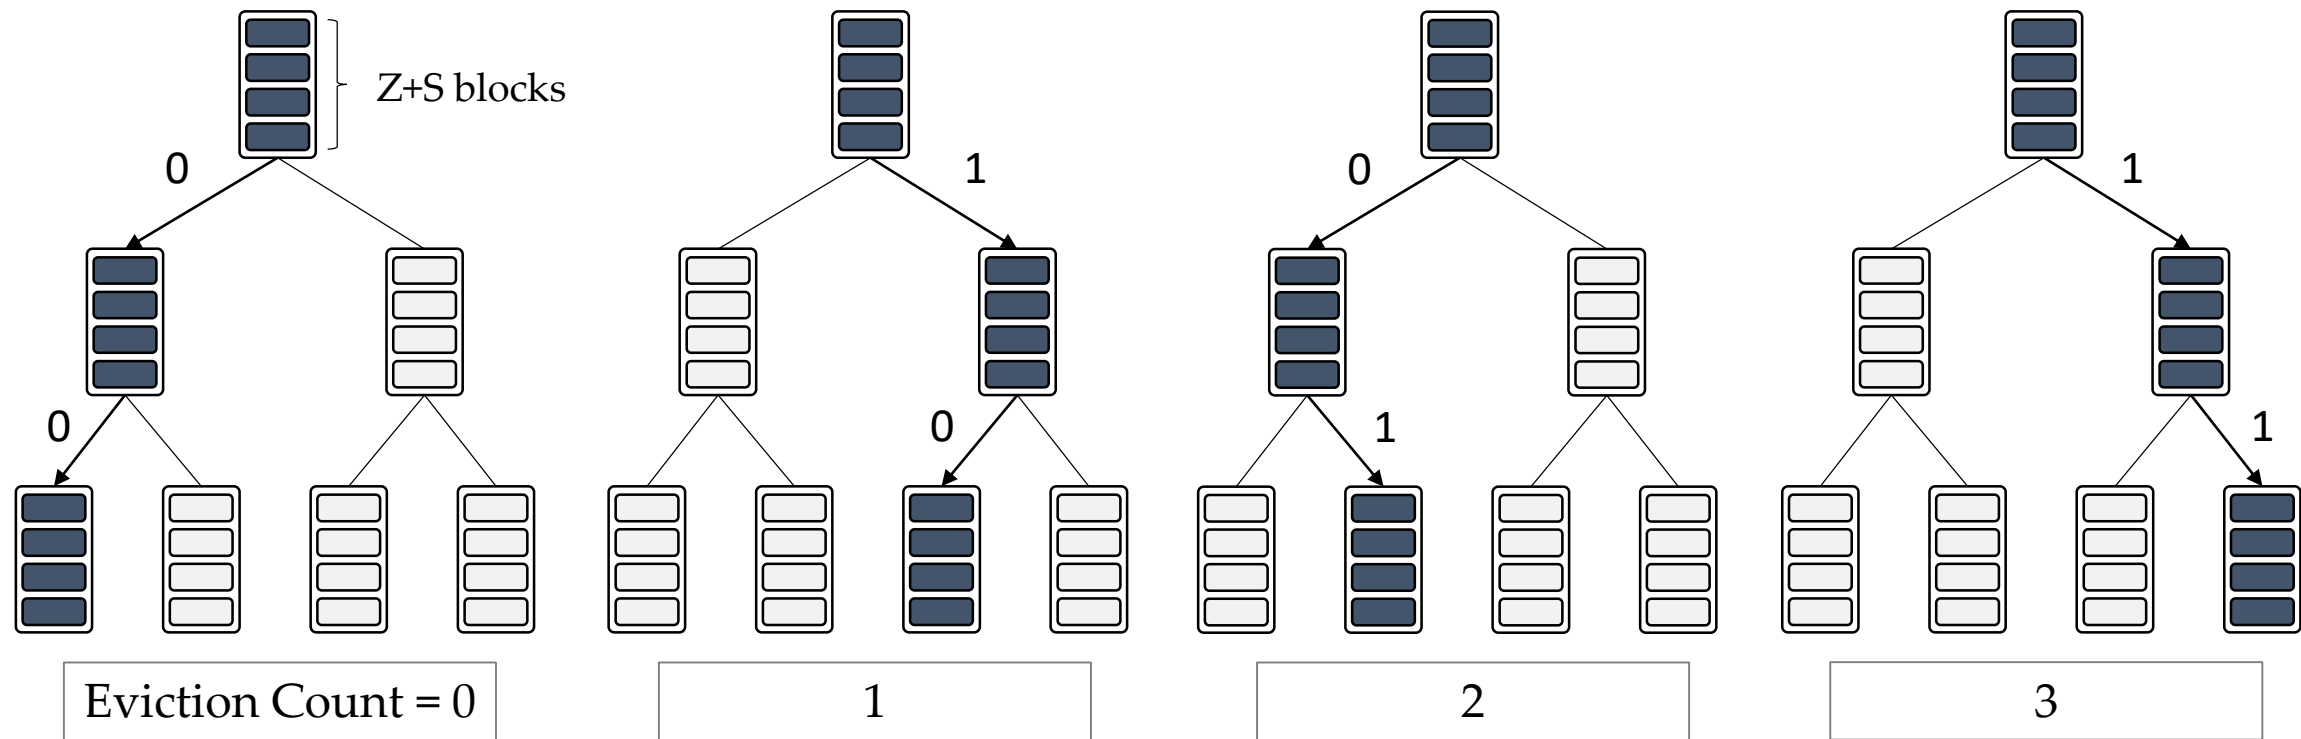

time

Supplement: Supplementary file 22 [file reverse_lexicographic_order.old.pdf › Figures/reverse_lexicographic_order.old.pdf]
